# Supplementary material for: Metabolic Regulations of Smilax china L. against β-Amyloid Toxicity in Caenorhabditis elegans
Source: MDPI journal article supplement (doi:10.3390/metabo14010049), 2024-01-13
Supplement: s1 [file s1]

**Supplementary:**

**Metabolic Regulations of *Smilax china* L. against  
 $\beta$ -Amyloid Toxicity in *Caenorhabditis elegans***

Lili Yan <sup>1</sup>, Yuchan Deng <sup>1</sup>, Yulan Du <sup>1</sup>, Xutong Fang <sup>1</sup>, Xin Fang <sup>2,\*</sup> and Qiang Zhang <sup>1,\*</sup>

1 Shaanxi Key Laboratory of Natural Products & Chemical Biology, College of Chemistry & Pharmacy,  
Northwest A&F University, Yangling 712100, China

2 State Key Laboratory of Phytochemistry and Plant Resources in West China, Kunming Institute of Botany,  
Chinese Academy of Sciences, Kunming 650201, China

\* Correspondence: xinfang@mail.kib.ac.cn (X.F.); zhangq@mail.nwsuaf.edu.cn (Q.Z.)

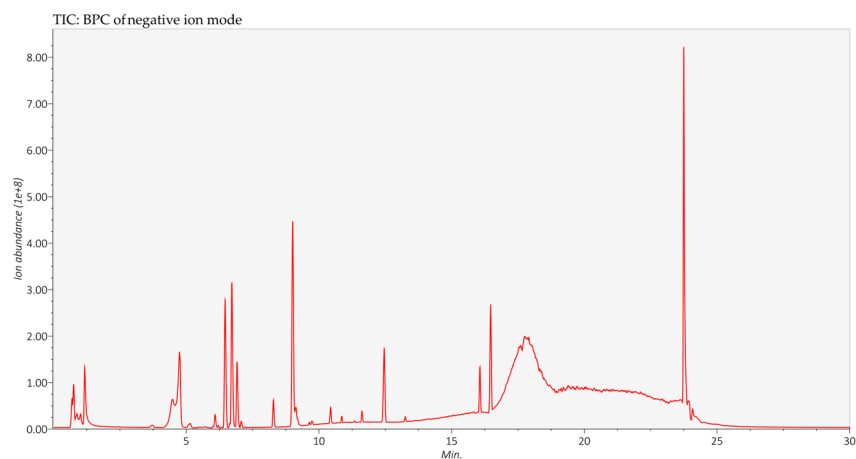

(1). Base peak chromatogram of negative ion mode.

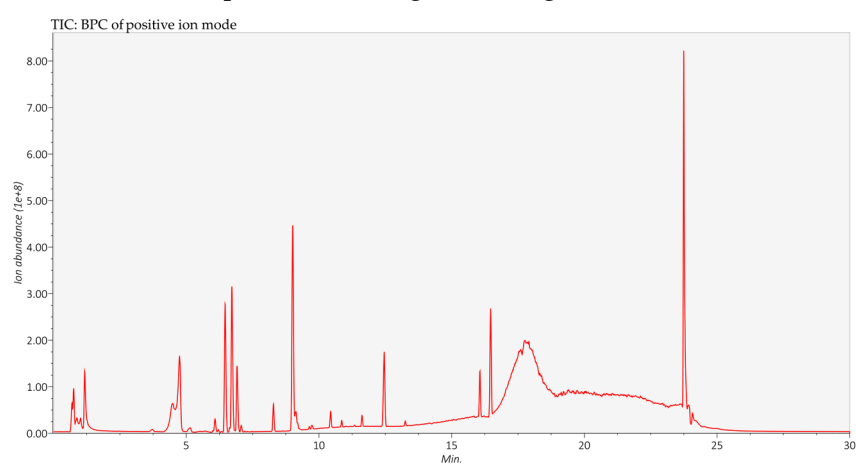

(2). Base peak chromatogram of positive ion mode.

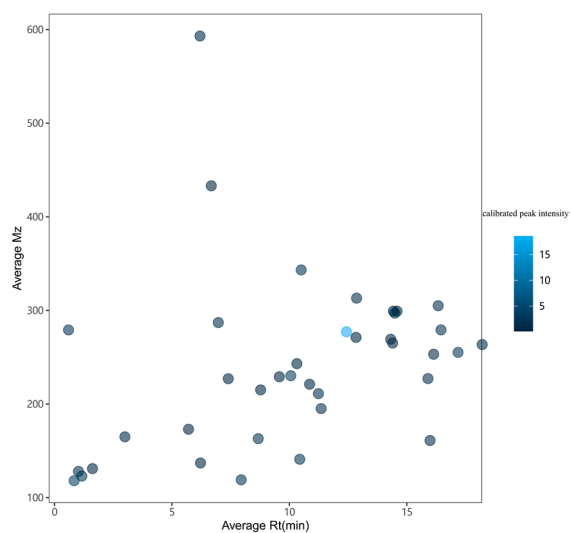

(3). Two-dimensional chromatograms of SCE.

**Figure S1.** Chromatogram of SCE.

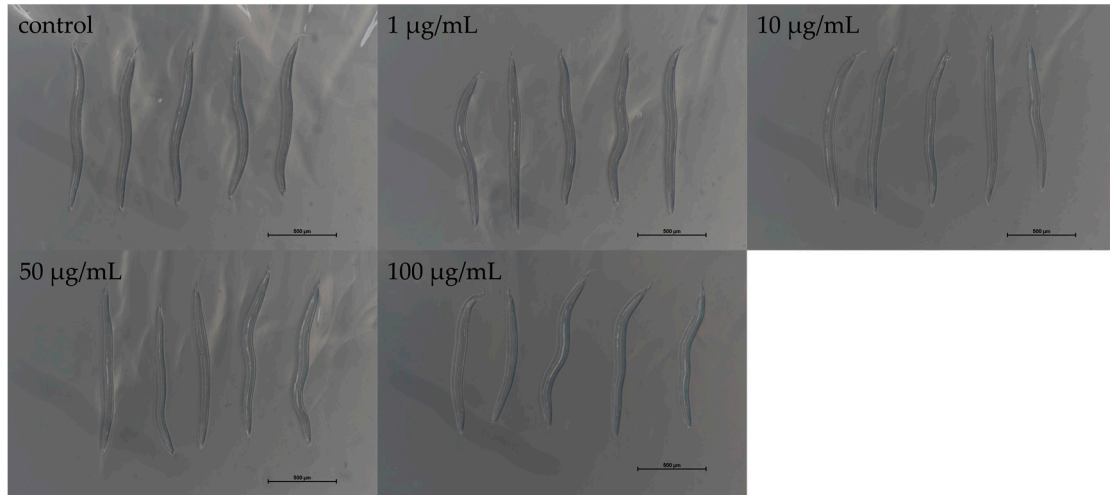

Selected pictures of *C. elegans* with ScE treatment. (30 worms per treatment)

**Figure S2.** SCE's impact on the body length of *C. elegans*.

**Table S1.** Putatively annotated ScE compounds by LC-HRMS.

| PubChem<br>CID | RT (min) | MF                                                            | Mode | Adduct | Average M/Z | MS/MS spectrum                                                                                                                                                                                  |
|----------------|----------|---------------------------------------------------------------|------|--------|-------------|-------------------------------------------------------------------------------------------------------------------------------------------------------------------------------------------------|
| 162935541      | 12.429   | C <sub>17</sub> H <sub>26</sub> O <sub>3</sub>                | ESI- | [M-H]- | 277.18063   | 183.89915,6717 277.18076,2628972                                                                                                                                                                |
| 1182           | 0.836    | C <sub>5</sub> H <sub>11</sub> NO <sub>2</sub>                | ESI+ | [M+H]+ | 118.08617   | 58.02928,101665 70.06555,61325 72.08114,2314811 76.93327,76405<br>87.53455,29869 109.06461,15421 118.0861,4133996                                                                               |
| 15433          | 10.061   | C <sub>14</sub> H <sub>31</sub> NO                            | ESI+ | [M+H]+ | 230.24706   | 57.07036,223078 61.7001,7323 62.06047,251437 69.07024,48264<br>93.06991,24477 109.10109,116048 169.98953,14615 176.15083,203862<br>187.97575,16233 211.18799,11106 230.24692,4475846            |
| 985            | 17.181   | C <sub>16</sub> H <sub>32</sub> O <sub>2</sub>                | ESI- | [M-H]- | 255.23265   | 71.00635,7920 98.13085,7998 116.92714,11256 170.98654,32485<br>227.79988,9826 254.98607,55619 255.23274,5396950                                                                                 |
| 3026           | 0.599    | C <sub>16</sub> H <sub>22</sub> O <sub>4</sub>                | ESI+ | [M+H]+ | 279.15814   | 92.65131,7284 132.95798,17531 149.02284,3662536 165.54724,7138<br>195.08026,14813 218.93042,17679 226.93771,8929 275.90082,23268<br>53.46519,4336 93.61445,4573 123.11646,5846 183.17366,104428 |
| 20281          | 10.502   | C <sub>19</sub> H <sub>39</sub> N <sub>2</sub> O <sub>3</sub> | ESI+ | [M]+   | 343.29437   | 240.23119,5162172 297.06372,16958 320.91818,25488<br>343.29407,348967                                                                                                                           |
| 12500          | 7.949    | C <sub>9</sub> H <sub>10</sub>                                | ES+  | [M+H]+ | 119.08543   | 76.9332,10188 79.0215,18822 91.05434,1234786 103.05422,34330<br>117.06971,79500 119.08529,1868532                                                                                               |
| 936            | 1.165    | C <sub>6</sub> H <sub>6</sub> N <sub>2</sub> O                | ESI+ | [M+H]+ | 123.05508   | 62.92944,13069 76.5154,22949 80.04971,308599 88.0043,8684<br>90.94786,6819 105.04462,24939 123.055,3279426                                                                                      |
| 10146          | 10.441   | C <sub>19</sub> H <sub>21</sub> NO <sub>2</sub>               | ESI- | [M-H]- | 141.01581   | 59.01258,4164605 92.99452,15529                                                                                                                                                                 |
| 5281426        | 8.675    | C <sub>9</sub> H <sub>6</sub> O <sub>3</sub>                  | ESI+ | [M+H]+ | 163.03848   | 58.99792,35443 80.94524,9327 95.04919,66698 117.06968,47634<br>123.03999,178999 133.02798,266704 141.05029,67880                                                                                |

163.03835,2543588

| PubChem<br>CID | RT (min) | MF                                                             | Mode | Adduct                      | Average M/Z | MS/MS spectrum                                                                                                                                                   |
|----------------|----------|----------------------------------------------------------------|------|-----------------------------|-------------|------------------------------------------------------------------------------------------------------------------------------------------------------------------|
| 5280450        | 16.454   | C <sub>18</sub> H <sub>32</sub> O <sub>2</sub>                 | ESI- | [M-H]-                      | 279.23267   | 59.01251,8428 192.98798,8116 238.99348,16070 258.99936,15203<br>278.18475,18862 279.23276,4211488<br>59.01257,8527 104.99465,4777 116.99471,3817 122.03176,13283 |
| 15385367       | 11.236   | C <sub>12</sub> H <sub>20</sub> O <sub>3</sub>                 | ESI- | [M-H]-                      | 211.13329   | 139.03902,10554 151.91724,4867 156.96126,27123 190.99217,17558<br>211.13333,432235                                                                               |
| 66556493       | 11.352   | C <sub>12</sub> H <sub>20</sub> O <sub>2</sub>                 | ESI- | [M-H]-                      | 195.13823   | 101.15147,3915 167.1432,90723 175.13251,4068 195.13828,2327946<br>57.03337,13972 83.01253,21619 123.04411,3395 125.02326,414329                                  |
| 662            | 6.975    | C <sub>15</sub> H <sub>12</sub> O <sub>6</sub>                 | ESI- | [M-H]-                      | 287.056     | 137.02351,2954 169.01315,2927 177.05481,39210 199.07581,14117<br>215.07091,27748 227.97272,11434 243.06598,87223 259.06107,583874<br>287.05612,678430            |
| 499            | 1.024    | C <sub>5</sub> H <sub>7</sub> NO <sub>3</sub>                  | ESI- | [M-H]-                      | 128.03418   | 55.75593,4805 74.80853,5232 94.66902,5662 128.03423,936603                                                                                                       |
| 10358150       | 12.862   | C <sub>19</sub> H <sub>20</sub> O <sub>4</sub>                 | ESI+ | [M+H]+                      | 313.1398    | 57.07027,10795 81.07004,5651 115.05382,6060 133.10074,3716<br>163.93968,2793 233.6207,3300 253.11876,191063 313.13959,558069                                     |
| 6030           | 16.335   | C <sub>9</sub> H <sub>13</sub> N <sub>2</sub> O <sub>9</sub> P | ESI- | [M-H <sub>2</sub> O-<br>H]- | 305.02286   | 59.01257,425324 125.45128,4210 141.01581,1026044 201.01418,9976<br>223.01933,37077 244.98425,19027 304.98355,34015                                               |
| 8205           | 15.9     | C <sub>14</sub> H <sub>28</sub> O <sub>2</sub>                 | ESI- | [M-H]-                      | 227.20108   | 59.01248,4331 80.62833,1595 125.92764,19383 140.99454,3221<br>142.99144,44374 162.9977,31304 186.99818,15493 211.13351,3527<br>227.2011,923234                   |
| 57404492       | 16.141   | C <sub>16</sub> H <sub>30</sub> O <sub>2</sub>                 | ESI- | [M-H]-                      | 253.21696   | 61.98714,4523 83.04889,12305 130.94859,4981 204.98868,10337<br>235.20592,12656 253.21703,2634709                                                                 |
| 11833          | 15.988   | C <sub>10</sub> H <sub>8</sub> O <sub>2</sub>                  | ESI- | [M+H]+                      | 161.05928   | 72.0448,2577 81.04495,3762 93.04504,5871 103.05424,19140                                                                                                         |

|                |          |                                                  |      |        |             | 105.06992,22483 120.05547,69449 121.06343,53133 133.06445,390129<br>161.0592,444326                                                                                                    |
|----------------|----------|--------------------------------------------------|------|--------|-------------|----------------------------------------------------------------------------------------------------------------------------------------------------------------------------------------|
| 625291         | 14.584   | C <sub>20</sub> H <sub>28</sub> O <sub>2</sub>   | ESI- | [M-H]- | 299.20148   | 55.60971,1738 166.99162,3660 174.99158,8255 210.99857,2724<br>259.00046,8830 279.00568,12730 299.20151,1315994                                                                         |
| 445639         | 17.361   | C <sub>18</sub> H <sub>34</sub> O <sub>2</sub>   | ESI- | [M-H]- | 281.24838   | 52.9985,2256 103.97529,5542 116.92733,5480 190.99271,3282<br>220.98416,4395 239.58968,2924 243.00493,3520 281.24847,1424063                                                            |
| 14921167       | 14.489   | C <sub>16</sub> H <sub>26</sub> O <sub>3</sub> S | ESI- | [M-H]- | 297.15274   | 59.01244,4329 170.00307,5796 183.01115,159681 256.98383,14154<br>296.23114,13620 297.15283,2491900                                                                                     |
| PubChem<br>CID | RT (min) | MF                                               | Mode | Adduct | Average M/Z | MS/MS spectrum                                                                                                                                                                         |
| 5483905        | 6.196    | C <sub>27</sub> H <sub>30</sub> O <sub>15</sub>  | ESI- | [M-H]- | 593.15149   | 100.74881,1234 123.04398,4364 137.02338,2614 171.04398,2613<br>189.05505,2338 219.03038,1875 241.05014,4770 255.02965,65896<br>284.03256,370886 511.34961,7636 593.15167,1002560       |
| 1017           | 2.999    | C <sub>8</sub> H <sub>6</sub> O <sub>4</sub>     | ESI- | [M-H]- | 165.01836   | 68.99432,993 121.02832,726688 145.00964,1090 164.03445,989<br>165.01839,67606                                                                                                          |
| 23628197       | 10.862   | C <sub>14</sub> H <sub>22</sub> O <sub>2</sub>   | ESI- | [M-H]- | 221.15405   | 54.39076,3335 92.99438,3509 103.91888,13160 192.98846,6271<br>205.12289,11354 221.15416,1590646                                                                                        |
| 8778           | 14.394   | C <sub>12</sub> H <sub>26</sub> O <sub>4</sub> S | ESI- | [M-H]- | 265.14777   | 61.98705,3992 78.95777,12732 96.95882,289522 108.98974,1711<br>178.99171,5550 224.99763,7169 265.14774,879940                                                                          |
| 439885         | 14.428   | C <sub>18</sub> H <sub>36</sub> O <sub>3</sub>   | ESI- | [M-H]- | 299.259     | 56.70603,2848 116.9275,5534 174.99159,9770 210.99901,4354<br>238.99379,8185 253.25342,13066 281.24832,18356 299.259,1526379<br>59.01259,8625 72.99183,6639 83.04661,1366 99.92458,3253 |
| 10457          | 5.707    | C <sub>8</sub> H <sub>14</sub> O <sub>4</sub>    | ESI- | [M-H]- | 173.08102   | 111.08033,285440 123.94518,1239 129.09099,23418 146.02371,1220<br>172.82965,6273 173.08102,190793                                                                                      |
| 5282997        | 14.313   | C <sub>16</sub> H <sub>30</sub> O <sub>3</sub>   | ESI- | [M-H]- | 269.2121    | 59.01262,7887 81.03332,3332 164.99588,6693 182.98697,4698<br>204.98875,5787 220.98369,7049 251.20137,34706 269.21213,622896                                                            |
| 21776027       | 12.837   | C <sub>16</sub> H <sub>32</sub> O <sub>3</sub>   | ESI- | [M-H]- | 271.22781   | 116.99464,1292 154.99185,1666 186.99796,8090 190.99159,2632                                                                                                                            |

|                |          |                                                 |      |        |             | 210.99858,6812 225.22171,2844 242.17572,2386 270.21613,8233<br>271.22775,698270<br>57.03333,1574 63.97582,818 116.92741,3700 125.87215,1863<br>152.99585,886 166.99152,15219 171.13794,2214 174.9915,8503<br>186.99782,3525 197.11752,125414 214.99313,38702 215.12823,330223 |
|----------------|----------|-------------------------------------------------|------|--------|-------------|-------------------------------------------------------------------------------------------------------------------------------------------------------------------------------------------------------------------------------------------------------------------------------|
| 15816          | 8.776    | C <sub>11</sub> H <sub>20</sub> O <sub>4</sub>  | ESI- | [M-H]- | 215.12828   | 85.59893,1496 152.99593,3268 181.15889,102441 194.98694,12621<br>214.99355,3458 225.14911,224130 243.15982,562613                                                                                                                                                             |
| 10458          | 10.319   | C <sub>13</sub> H <sub>24</sub> O <sub>4</sub>  | ESI- | [M-H]- | 243.15987   | 59.01257,16780 93.03329,16637 107.01266,7095 145.02834,2566<br>151.00261,131811 177.01845,14557 244.9754,5536 269.0455,23082<br>271.06116,730708 414.94269,2483                                                                                                               |
| 92794          | 6.676    | C <sub>21</sub> H <sub>22</sub> O <sub>10</sub> | ESI- | [M-H]- | 433.1138    |                                                                                                                                                                                                                                                                               |
| PubChem<br>CID | RT (min) | MF                                              | Mode | Adduct | Average M/Z | MS/MS spectrum                                                                                                                                                                                                                                                                |
| 445154         | 7.399    | C <sub>14</sub> H <sub>12</sub> O <sub>3</sub>  | ESI- | [M-H]- | 227.07094   | 139.11169,6285 142.99152,17028 154.94551,2706 159.08063,6391<br>172.95636,7409 182.07268,3701 185.06003,53025 207.00491,10269<br>225.0551,2747 227.07092,529512<br>53.56525,812 92.99445,9905 103.93913,1072 129.05461,5212                                                   |
| 12736          | 9.572    | C <sub>12</sub> H <sub>22</sub> O <sub>4</sub>  | ESI- | [M-H]- | 229.14406   | 140.99472,6369 156.91995,1771 161.00096,7887 173.92519,3083<br>181.00728,6364 208.98404,11753 211.1333,138895 229.14406,349156                                                                                                                                                |
| 338            | 6.217    | C <sub>7</sub> H <sub>6</sub> O <sub>3</sub>    | ESI- | [M-H]- | 137.02332   | 67.02889,1168 93.0333,245268 105.95905,1398 118.02854,1015<br>136.86176,17681                                                                                                                                                                                                 |
| 10349          | 1.619    | C <sub>5</sub> H <sub>8</sub> O <sub>4</sub>    | ESI- | [M-H]- | 131.03387   | 59.0126,12819 72.99184,8715 85.06455,5883 87.04388,167435<br>112.03951,624 131.03387,49501                                                                                                                                                                                    |

CID, pubchem cid. All the structures can be acquired directly from PubChem (<https://pubchem.ncbi.nlm.nih.gov>) by CID.

**Table S2.** Enrichments of differential metabolites invoked by SCE (G3/G2 and G2/G1).

| KEGG ID  | KEGG name                                                     | <i>p</i> value |
|----------|---------------------------------------------------------------|----------------|
| cel00061 | Fatty acid biosynthesis                                       | 0.00104608     |
| cel00280 | Valine, leucine and isoleucine degradation                    | 0.000001       |
| cel00410 | beta-Alanine metabolism                                       | 0.0001506      |
| cel00630 | Glyoxylate and dicarboxylate metabolism                       | 0.00285858     |
| cel00400 | Phenylalanine, tyrosine and tryptophan biosynthesis           | 0.00806879     |
| M00039   | Monolignol biosynthesis, phenylalanine/tyrosine => monolignol | 3.3978E-05     |
| M00013   | Malonate semialdehyde pathway, propanoyl-CoA => acetyl-CoA    | 0.0009316      |
| M00741   | Propanoyl-CoA metabolism, propanoyl-CoA => succinyl-CoA       | 0.0012695      |
| M00874   | Fatty acid biosynthesis in mitochondria, fungi                | 0.00472245     |
| M00082   | Fatty acid biosynthesis, initiation                           | 0.00635424     |
| M00086   | beta-Oxidation, acyl-CoA synthesis                            | 0.00766395     |
| M00873   | Fatty acid biosynthesis in mitochondria, animals              | 0.00739053     |
| M00027   | GABA (gamma-Aminobutyrate) shunt                              | 0.00860417     |
| M00083   | Fatty acid biosynthesis, elongation                           | 0.01226873     |
| M00085   | Fatty acid elongation in mitochondria                         | 0.0187349      |
| M00032   | Lysine degradation, lysine => saccharopine => acetoacetyl-CoA | 0.04689724     |
| M00036   | Leucine degradation, leucine => acetoacetate + acetyl-CoA     | 0.01178182     |



**Table S3.** Primers used for qRT-PCR analysis.

| NCBI Gene ID | Cene name         | Oligo Name         | sequence (5' to 3')       |
|--------------|-------------------|--------------------|---------------------------|
| 172981       | DAF-16            | DAF-16-F           | TACATTGCTCGAAGTGCCGA      |
|              |                   | DAF-16-R           | TCAGATGGTAGCGGCGAATC      |
| 177343       | skn-1             | skn-1-F            | TCTACTCTTTCCTCCCTTCGG     |
|              |                   | skn-1-R            | ACAAGGGGATGGGGATCAGA      |
| 173078       | hsf-1             | hsf-1-F            | AGGAGGACCATCTACATCATCTTCG |
|              |                   | hsf-1-R            | CTATTCACCTGAGCCATTTGCCTAG |
| 172301       | T09B4.8 R         | T09B4.8-F          | TCAGTTGGACATTGTCATCCGTGAG |
|              |                   | T09B4.8-R          | GCTTCTGTGCTTGCTCGGTAAGAG  |
| 850514       | agx-1             | agxt-1-F           | TGACCGATCTCTGGGTGTCTTCTC  |
|              |                   | agx-1-R            | GCGGCAAATATCTCTGTGACTCCTC |
| 173300       | ech-7             | ech-7              | AGGCTGTTCTGTTGGCTGATAGG   |
|              |                   | ech-7-R            | AGGTAAGCAGGCGTAGGCATTC    |
|              | Amy-1             | Amy-1-F            | CCGACATGACTCAGGATATGAAGT  |
|              |                   | Amy-1-R            | CACCATGAGTCCAATGATTGCA    |
|              | A $\beta$ (1-42)) | A $\beta$ (1-42)-F | CCGACATGACTCAGGATATGAAGT  |
|              |                   | A $\beta$ (1-42)-R | CACCATGAGTCCAATGATTGCA    |
|              | Ref               | $\beta$ -actin-F   | ATCCATCGTTCACCGCAAGT      |
|              |                   | $\beta$ -actin-R   | TAAGGACAAAAATGGGGCGG      |
